# Supplementary material
Source: PubMed Central journal article supplement (PMC3503456)

**Table E1:** Top signals of allelic association at SNPs within an ancestry association peak on 6q in African Americans correcting for global ancestry (global correction). None of the SNPs pass a bonferroni correction for 9,266 tests ( $p < 5.4 \times 10^{-6}$ ). Included in the table are logistic regression p-values from local ancestry association testing, and allelic association testing corrected for local ancestry (local correction). Included are the reference allele frequencies (freq) in the HapMap CEU and YRI (release 28), indicating that all of the top SNPs are informative for European-African ancestry.

| SNP        | Position (hg18) | p-value local ancestry | p-value allelic, global correction | p-value allelic, local correction | freq CEU | freq YRI |
|------------|-----------------|------------------------|------------------------------------|-----------------------------------|----------|----------|
| rs10498989 | 95446907        | $6.30 \times 10^{-4}$  | $8.56 \times 10^{-6}$              | $1.46 \times 10^{-3}$             | 0.295    | 0.897    |
| rs9345075  | 91799831        | $4.94 \times 10^{-4}$  | $1.61 \times 10^{-5}$              | $1.36 \times 10^{-3}$             | 0.902    | 0.367    |
| rs9363229  | 95415689        | $6.30 \times 10^{-4}$  | $1.67 \times 10^{-5}$              | $2.29 \times 10^{-3}$             | 0.323    | 0.895    |
| rs576231   | 100245282       | $9.18 \times 10^{-4}$  | $1.67 \times 10^{-5}$              | $4.38 \times 10^{-4}$             | 0.239    | 0.014    |
| rs2207428  | 95209649        | $6.17 \times 10^{-5}$  | $4.20 \times 10^{-5}$              | $3.47 \times 10^{-3}$             | 0.332    | 0.003    |

**Table E2:** SNPs with association p-values < 0.01 among 257 genotyped SNPs within a 1Mb region centered on rs1361549 in stratified tests for African American subjects with one or more chromosomes of local European ancestry (Admixed) or two chromosomes of local African ancestry (African). Association p-values are also shown for the CSGA/SARP European Americans. SNPs are ordered based on position; p-values < 0.01 in any one of the stratified tests are shaded; the strongest signal of association is with rs1361549 (in bold). Estimates of LD with rs1361549 were calculated in African Americans with local European ancestry using Haploview (Figure E6 and S7).

| SNP              | Position        | P-value African      | Coefficient African | P-value Admixed             | Coefficient Admixed | P-value European Americans | Distance from rs136154 and LD ( $r^2$ ) | eQTL candidates* (gene, p-value, population)                |
|------------------|-----------------|----------------------|---------------------|-----------------------------|---------------------|----------------------------|-----------------------------------------|-------------------------------------------------------------|
| rs10455382       | 82077709        | 0.97                 | 0.0049              | 9.4x10 <sup>-5</sup>        | -0.69               | 0.33                       | -266695 (0.24)                          | PRR15, CEU, 3e-05<br>SPSB1, YRI, 4e-05<br>ASB2, YRI, 8e-05  |
| rs12055792       | 82079376        | 0.86                 | 0.03                | 9.6x10 <sup>-3</sup>        | -0.58               | 0.51                       | -265028 (0.08)                          | IGF2BP3, CEU, 3e-05                                         |
| rs4706889        | 82129155        | 0.88                 | -0.02               | 6.4x10 <sup>-4</sup>        | 0.62                | 0.28                       | -215249 (0.32)                          | PRR15, CEU, 4e-05                                           |
| rs1015916        | 82129430        | 0.38                 | -0.28               | 4.9 x10 <sup>-3</sup>       | -0.76               | 0.69                       | -214974 (0.05)                          | IGF2BP3, CEU, 5e-05                                         |
| rs9341883        | 82148380        | 0.91                 | -0.015              | 4.8 x10 <sup>-4</sup>       | -0.62               | 0.91                       | -196024 (0.24)                          | NA                                                          |
| rs2323252        | 82155910        | 0.86                 | -0.024              | 3.5 x10 <sup>-4</sup>       | 0.67                | 0.23                       | -188494 (0.33)                          | PRR15, CEU, 2e-05                                           |
| rs11756740       | 82165844        | 0.48                 | -0.41               | 5.5 x10 <sup>-3</sup>       | -0.92               | 0.30                       | -178560 (0.033)                         | IGF2BP3, CEU, 0.0001                                        |
| rs7741650        | 82185636        | 0.64                 | 0.06                | 6.5 x10 <sup>-3</sup>       | -0.47               | 0.91                       | -158768 (0.22)                          | CNR2, YRI, 2e-05<br>GMIP, YRI, 0.0001                       |
| rs1343232        | 82187051        | 0.53                 | -0.09               | 3.5 x10 <sup>-3</sup>       | 0.53                | 0.30                       | -157353 (0.32)                          | FCRLA, YRI, 2e-06<br>CNR2, YRI, 2e-05<br>PRR15, CEU, 0.0001 |
| rs6940202        | 82190504        | 0.29                 | 0.14                | 3.9 x10 <sup>-3</sup>       | -0.50               | 0.83                       | -153900 (0.26)                          | CNR2, YRI, 2e-05<br>FCRLA, YRI, 9e-05<br>VIPR1, YRI, 0.0001 |
| rs2120533        | 82206201        | 0.38                 | -0.12               | 2.0 x10 <sup>-3</sup>       | 0.56                | 0.31                       | -138203 (0.30)                          | NA                                                          |
| rs17438648       | 82216223        | 0.38                 | 0.12                | 1.9 x10 <sup>-3</sup>       | -0.57               | 0.30                       | -128181 (0.30)                          | FCRLA, YRI, 1e-05<br>CNR2, YRI, 6e-05<br>PRR15, CEU, 0.0001 |
| <b>rs1361549</b> | <b>82344404</b> | <b>NA</b>            | <b>NA</b>           | <b>1.1 x10<sup>-5</sup></b> | <b>-1.1</b>         | <b>0.43</b>                | <b>0 (1)</b>                            | <b>NA</b>                                                   |
| rs2298053        | 82424008        | 1.4x10 <sup>-3</sup> | 1.6                 | 0.32                        | -0.42               | 0.58                       | 79604 (0.012)                           | NA                                                          |
| rs12664410       | 82428442        | 1.1x10 <sup>-3</sup> | 1.5                 | 0.21                        | -0.52               | 0.58                       | 84038 (0.013)                           | NA                                                          |
| rs1935420        | 82745959        | 0.60                 | 0.20                | 6.9x10 <sup>-3</sup>        | 1.4                 | 0.82                       | 401555 (0.034)                          | FGL2, CEU, 6e-05<br>TP53INP1, CEU, 0.0001                   |

\* From www.scandb.org (Gamazon, Zhang et al. 2010, Bioinformatics, 26(2):259-62)

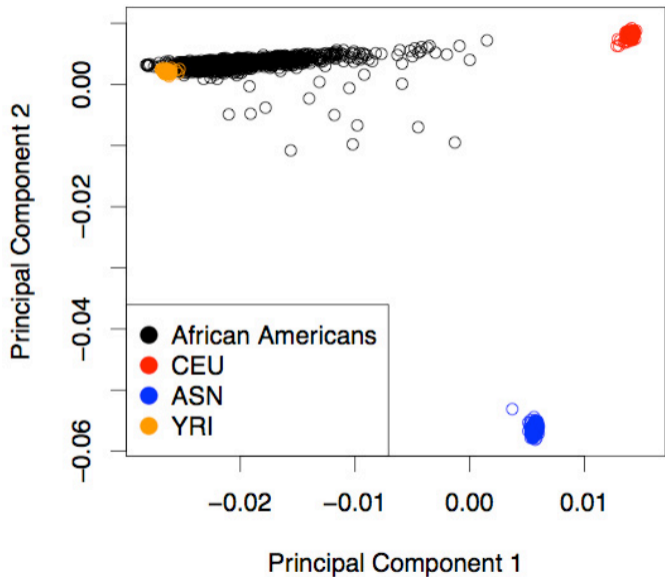

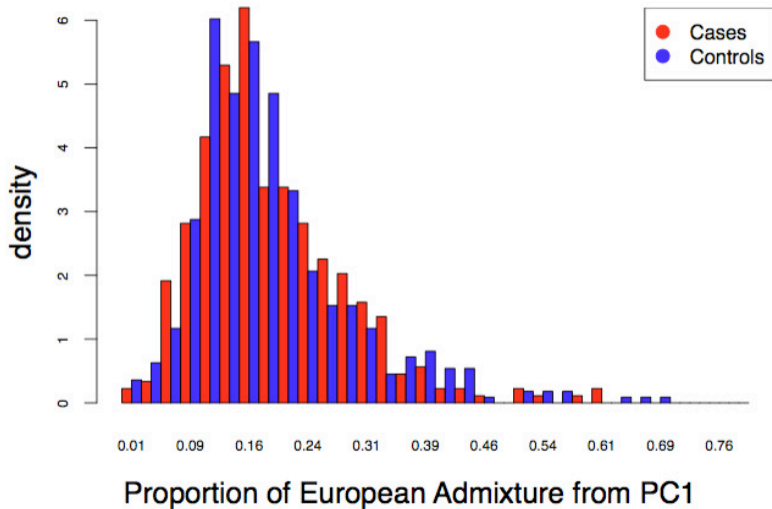

Global African Ancestry

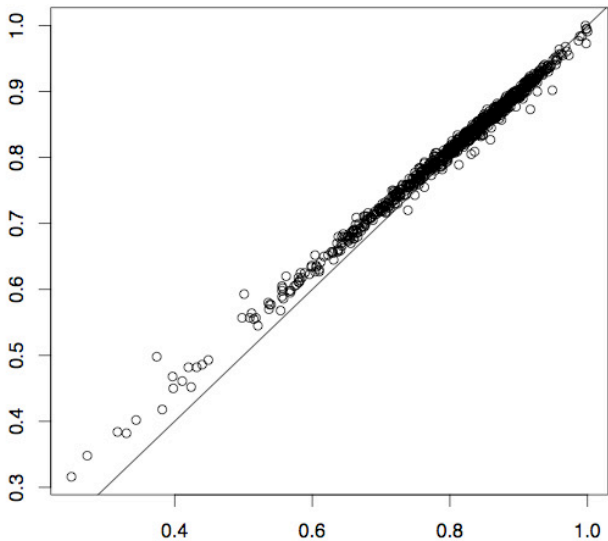

Mean Local African Ancestry

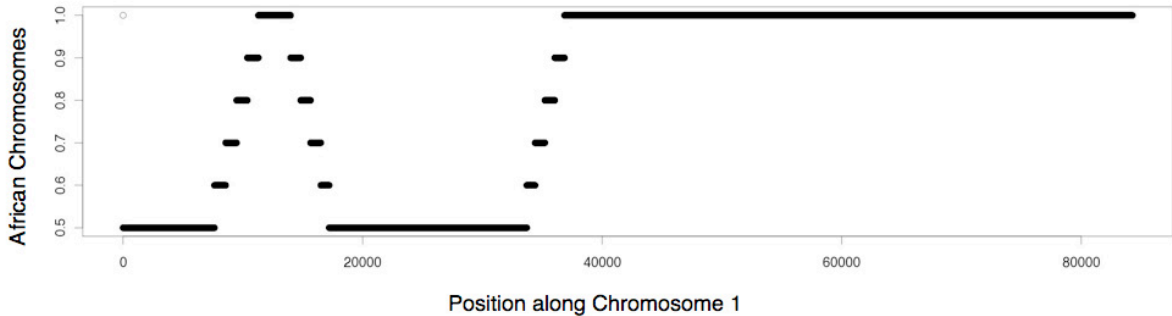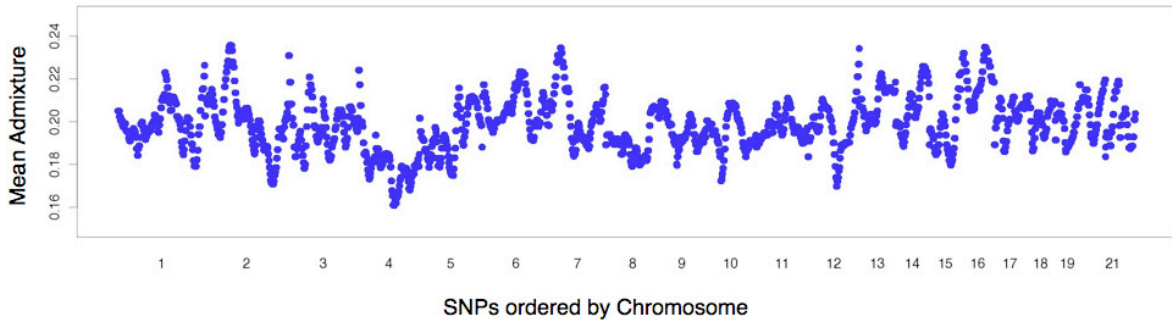



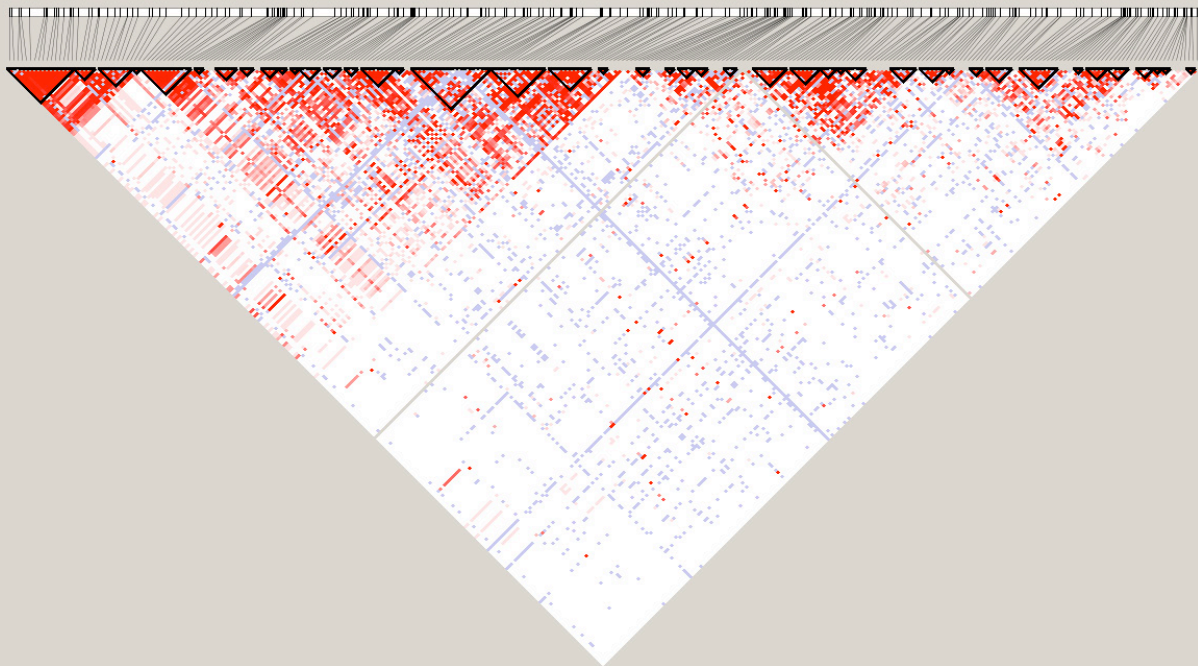

Supplement: NIHMS370734-supplement-supplement_1.pdf [file NIHMS370734-supplement-supplement_1.pdf]
